# Supplementary material for: NLRP3 inflammasome via IL-1β regulates PCSK9 secretion
Source: PubMed Central journal article supplement (PMC7330863; doi:10.7150/thno.45939), 2020-05-30

**Supplemental Figure 1.** (A) Gene knockout validation in different mice. (B) PCSK9 expression in a variety of tissues from wild-type (WT) and several gene deletion mice groups. (C) Effect of insulin on PCSK9 expression. Western blots shown are representative of 3-5 independent experiments.

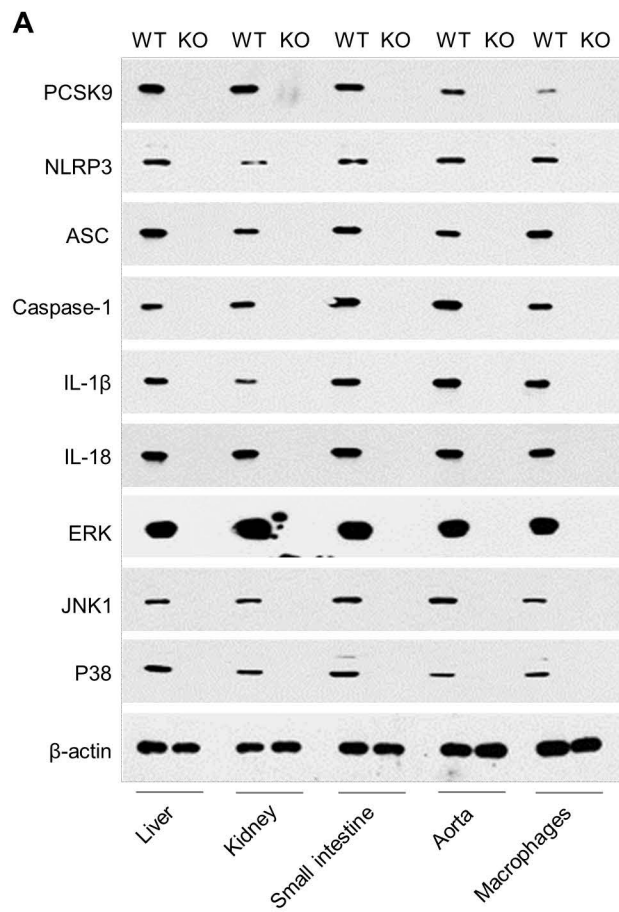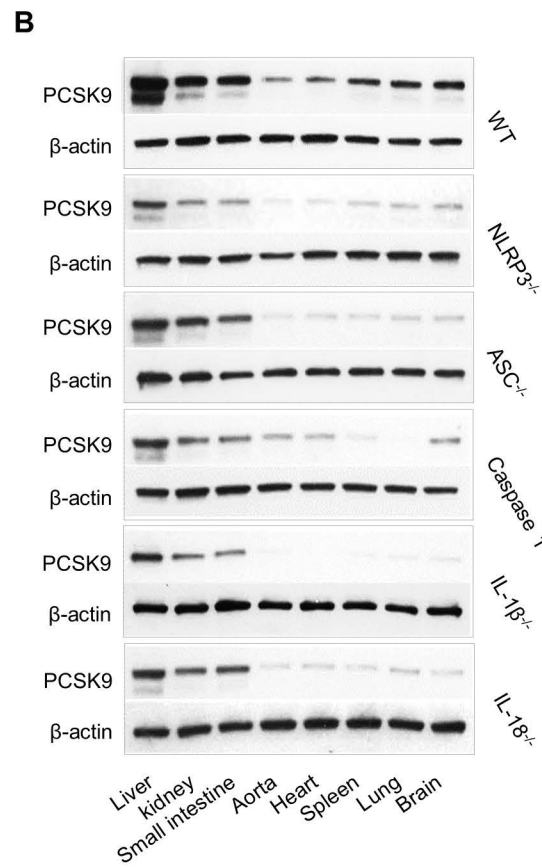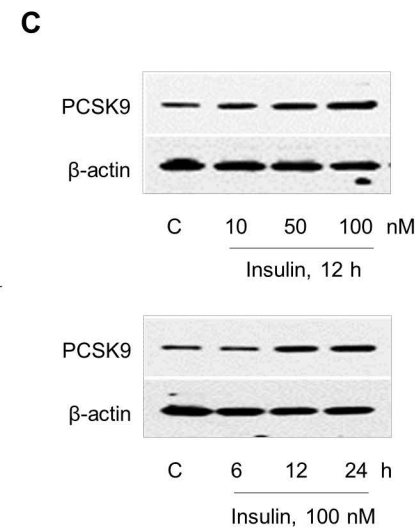

Supplement: thnov10p7100s1.pdf [file thnov10p7100s1.pdf]
